# Supplementary material for: Inheritance of Resistance to Cry1A.105 in Helicoverpa zea (Boddie) (Lepidoptera: Noctuidae)
Source: Insects. 2022 Sep 27;13(10):875. doi: 10.3390/insects13100875 (PMC9604160; doi:10.3390/insects13100875)
Supplement: Supplementary file 1 [file insects-13-00875-s001.zip › insects-1900739-supplementary.pdf]

## Supporting Information (SI)

**Table S1.** Larval mortality (% mean  $\pm$  sem) of different genetic populations of *H. zea* at four Cry1A.105 concentrations in diet-overlay bioassays\*.

| Insect Population          | Cry1A.105 Concentration (µg/cm <sup>2</sup> )                                                                                                                                       |                |                |                |
|----------------------------|-------------------------------------------------------------------------------------------------------------------------------------------------------------------------------------|----------------|----------------|----------------|
|                            | 1.00                                                                                                                                                                                | 3.16           | 10.00          | 31.60          |
| Test-I                     |                                                                                                                                                                                     |                |                |                |
| BZ-SS                      | 100 ± 0.0 a                                                                                                                                                                         | 100 ± 0.0 a    | 100 ± 0.0 a    | Not available  |
| Cry1A.105-RR               | 0.0 ± 0.0 g                                                                                                                                                                         | 17.2 ± 8.7 f   | 31.3 ± 6.8 ef  | 60.9 ± 3.0 bcd |
| Cry1A.105-F <sub>1a</sub>  | 33.3 ± 9.2 def                                                                                                                                                                      | 50.8 ± 9.1 cde | 79.4 ± 6.0 bc  | 89.8 ± 1.5 ab  |
| Cry1A.105-F <sub>1b</sub>  | 55.2 ± 8.3 cde                                                                                                                                                                      | 65.9 ± 4.0 bcd | 68.0 ± 7.8 bc  | 79.2 ± 4.8 bc  |
| Pooled F <sub>1</sub>      | 44.3 ± 7.1                                                                                                                                                                          | 58.3 ± 5.5     | 73.7 ± 5.0     | 84.5 ± 3.5     |
| ANOVA                      | F <sub>3,45</sub> = 159.76, P < 0.0001 for population; F <sub>3,45</sub> = 35.91, P < 0.0001 for Bt concentration; and F <sub>8,45</sub> = 4.64, P = 0.0004 for interaction.        |                |                |                |
| Test-II                    |                                                                                                                                                                                     |                |                |                |
| BZ-SS                      | 100 ± 0.0 a                                                                                                                                                                         | 100 ± 0.0 a    | 100 ± 0.0 a    | Not available  |
| Cry1A.105-RR'              | 21.0 ± 2.5 h                                                                                                                                                                        | 28.6 ± 4.6 gh  | 48.1 ± 2.5 efg | 52.8±6.1 efg   |
| Cry1A.105-F <sub>1'a</sub> | 28.3 ± 4.5 gh                                                                                                                                                                       | 28.9 ± 2.7 gh  | 51.6 ± 4.1 efg | 67.2 ± 6.9 b-e |
| Cry1A.105-F <sub>1'b</sub> | 20.4 ± 6.5 h                                                                                                                                                                        | 35.9 ± 3.0 fgh | 60.2 ± 5.5 b-f | 68.8 ± 6.8 b-e |
| Pooled F <sub>1'</sub>     | 24.3 ± 4.0                                                                                                                                                                          | 32.4 ± 2.3     | 55.9 ± 2.6     | 68.0 ± 4.5     |
| Cry1A.105-F <sub>2'</sub>  | 35.2 ± 3.2 fgh                                                                                                                                                                      | 53.6 ± 6.5d-g  | 60.0 ± 3.5 c-f | 84.4 ± 3.1bc   |
| Cry1A.105-BC'              | 62.5 ± 7.1 b-f                                                                                                                                                                      | 64.1 ± 7.0 b-f | 78.9 ± 5.5 bcd | 85.9 ± 3.9 b   |
| ANOVA                      | F <sub>5,85</sub> = 139.88, P < 0.0001 for insect population; F <sub>3,85</sub> = 54.04, P < 0.0001 for Bt concentration; and F <sub>14,85</sub> = 1.84, P = 0.0459 for interaction |                |                |                |

\* Means followed by the same letter within each test are not significantly different (LSMEANS tests,  $\alpha = 0.05$ ). If a mean was followed by four or more letters, an abbreviation with only the first and last letters are presented; for example, 'b-f' means 'bcdef'.
